# Supplementary material
Source: publisher figshare collection journal article supplement (https://frontiersin.figshare.com/ndownloader/files/11255516)
Supplement: Supplementary file 1 [file 11255516]

## Sheet: S1
Table S1: Sample REE concentrations (pmol/kg)
	Depth	La	Ce	Pr	Nd	Sm	Eu	Gd	Tb	Dy	Ho	Er	Tm	Yb	Lu	Y
	(m)	(pmol/kg)
Station IB 23: 63.62 °N, 20.21 °W, 132 m bottom depth
	50.996	50.4122	66.9566	12.0393	52.9459	11.6982	2.98879	12.6524	2.0479	11.6793	2.66208	8.30786	1.13331	7.19769	1.13338	209.193
	101.928	77.3938	137.094	21.1901	90.3097	20.0205	5.50135	21.7569	3.49116	18.7435	4.09877	11.2144	1.72647	9.87475	1.45639	245.348
Station IB22: 63.22 °N, 20.07 °W, 679 m bottom depth
	6.582	23.8968	9.92103	4.35992	20.0208	4.116	0.970382	4.95929	0.805009	5.38636	1.37531	4.70382	0.689124	4.04717	0.735648	117.857
	25.978	26.6625	12.0033	5.30542	20.8875	4.6031	1.08886	5.58133	0.829386	6.22786	1.53132	5.25235	0.694359	4.78829	0.697135	152.17
Station IB16: 61.75 °N, 20.00 °W, 1820 m bottom depth
	5.842	25.7701	8.75295	4.4663	19.0904	3.36952	1.0783	5.46741	0.730305	5.1257	1.33959	5.00568	0.757533	4.3859	0.690967	144.682
	5.896	26.8092	8.07639	4.54649	20.5204	4.22074	1.06385	5.05748	0.857424	5.77146	1.58874	5.24774	0.749037	4.57216	0.711573	154.888
	5.896	24.6468	7.52978	4.53969	19.3063	3.98007	0.951154	5.02889	0.850583	5.6564	1.45505	4.94338	0.736661	4.47405	0.736629	138.437
	101.354	24.7992	8.51568	4.34635	18.5955	3.53972	0.826545	5.63616	0.854195	5.84834	1.42673	4.85886	0.67941	4.46027	0.731907	140.457
	351.144	25.1773	6.75686	4.26303	19.0495	4.21025	0.8957	5.0879	0.82387	5.70343	1.55204	4.74005	0.717268	4.38337	0.704946	145.454
	750.307	26.0062	6.8711	4.83509	19.8346	4.07818	1.0788	5.57957	0.88166	6.2796	1.6243	5.05069	0.699897	4.91397	0.837553	149.409
	750.582	26.9477	6.76473	4.67358	19.653	4.00469	0.923505	5.16911	0.890079	6.05967	1.58052	5.14502	0.756654	4.83949	0.800502	152.642
	1549.88	25.3472	15.3041	5.23028	22.2909	5.17018	1.16285	6.10258	0.885257	6.62621	1.56195	5.30986	0.781379	5.21057	0.823815	150.329
	1549.88	25.6764	12.321	4.74565	21.0591	4.64532	1.17964	5.50807	0.962114	6.71096	1.62298	5.50952	0.716846	5.20606	0.829334	153.849
	1685.63	27.9701	16.5761	5.45324	23.8787	4.9751	1.18468	6.02548	1.01814	7.07541	1.69191	5.71598	0.786703	5.19465	0.79314	160.268
	1685.63	28.2006	19.5416	5.7047	25.1253	5.31659	1.33634	6.7328	1.11093	7.33843	1.79327	5.7761	0.839269	5.31271	0.864524	161.878
Station IB9: 59.33 °N, 18.23 °W, 1878 m bottom depth
	10.746	22.9903	6.90101	3.9818	17.3641	3.44013	0.822311	4.63686	0.687149	5.30035	1.3052	4.36254	0.666263	4.30731	0.689567	147.251
	12.134	24.4373	7.38847	4.25734	18.6057	3.4455	0.959521	4.78814	0.670267	5.61736	1.38795	4.6457	0.641265	4.31343	0.698626	150.919
	350.571	25.2422	7.70792	4.37844	17.9536	3.37021	0.856732	4.98924	0.750209	5.47197	1.40135	4.37896	0.650763	4.19374	0.692108	151.972
	710.334	24.7346	4.83334	4.41975	18.6477	3.79431	0.918648	5.0624	0.778266	5.60189	1.56716	4.73202	0.708984	4.68494	0.666432	154.76
	1003.88	24.7673	4.27933	4.73708	19.4688	4.20288	0.850214	5.14908	0.809851	5.70329	1.45034	5.33528	0.756638	4.57783	0.803727	144.451
	1502.05	23.4578	5.37786	4.243	18.7332	3.65072	0.87997	4.73106	0.724967	5.75776	1.47536	5.20377	0.73007	4.7981	0.756877	156.898
	1502.05	23.9615	5.09449	4.06306	17.4074	3.31528	0.842745	4.72783	0.705526	5.15265	1.46602	5.19124	0.680824	4.9051	0.830102	141.698
	1502.05	23.7295	5.08845	4.29667	18.7043	3.35826	0.787794	4.6907	0.772428	5.39132	1.53307	4.97248	0.699947	4.70346	0.849361	144.017
	1841.93	26.0368	9.57681	4.61146	20.4367	4.85663	1.12734	5.40853	0.836845	6.50883	1.52534	5.10875	0.786245	5.09117	0.777146	158.493
	1841.94	28.4137	10.6848	5.14776	21.8366	4.81246	1.05555	5.84763	0.9095	6.57783	1.6499	5.64913	0.813604	5.21881	0.859396	163.622
Station IB4: 58.50 °N, 16.00 °W, 1209 m bottom depth
	10.37	24.38	5.87495	4.04513	17.7666	3.94318	0.826309	4.61942	0.751981	4.96716	1.40124	4.5945	0.689117	4.07637	0.704763	141.838
	10.37	24.0955	6.19353	4.08759	18.1812	4.23334	0.87283	5.06929	0.70404	5.37174	1.47626	4.7344	0.696451	4.40779	0.680389	146.098
	25.614	23.6527	5.91118	4.2501	17.831	4.25636	0.912637	4.56019	0.77234	5.6806	1.48696	4.80311	0.651423	4.50193	0.661288	147.278
	149.757	21.9864	5.94887	3.91655	17.0554	3.30161	0.865917	4.10538	0.754885	5.35994	1.30207	4.46957	0.64679	4.32953	0.621728	148.144
	449.348	22.2903	6.26151	3.74255	16.7557	3.39779	0.934356	4.56999	0.785244	5.02556	1.31599	4.35241	0.576879	3.95153	0.601649	148.196
	800.872	24.0331	5.45118	4.12575	17.628	3.8122	0.800312	4.61469	0.744159	5.67675	1.45079	4.62102	0.687574	4.73651	0.776015	157.328
	984.727	21.8175	4.80706	3.71382	16.5735	3.74536	0.80758	4.29787	0.679412	5.09851	1.48302	4.51362	0.690508	4.66615	0.744933	149.532
	985.446	22.2802	4.74694	3.76892	15.6881	3.55844	0.765172	4.27524	0.719826	4.81897	1.33702	4.52663	0.616303	4.60199	0.631308	151.41
Station F: 57.51 °N, 12.25 °W, 1825 m bottom depth
	4.508	23.5432	6.60259	3.8846	16.992	3.38886	0.87132	4.84698	0.785492	5.82396	1.42897	4.97938	0.706638	4.13852	0.667017	146.395
	5.244	21.6154	6.10791	3.87299	16.425	3.5142	0.738789	4.67816	0.755766	5.39948	1.36777	4.53168	0.62533	4.28085	0.653298	139.251
	5.244	23.5047	6.35608	4.03294	18.1987	3.98422	0.897182	4.91759	0.835975	5.93045	1.42266	4.84144	0.691605	4.45096	0.660457	149.94
	100.159	24.1726	6.73103	4.45228	18.3018	3.78276	0.873357	4.80636	0.809237	5.3646	1.48767	4.93471	0.679669	4.28469	0.677001	146.782
	100.159	22.7834	7.03081	4.59209	17.9794	3.49502	0.905244	4.97799	0.790098	5.36934	1.43693	4.86418	0.689366	4.56491	0.654556	138.732
	599.167	23.3743	6.3111	4.22665	17.5317	3.94538	0.823665	4.86777	0.818089	5.74521	1.54197	5.06402	0.729601	4.47404	0.689706	148.299
	1000.06	25.2972	5.06473	4.04602	17.7689	3.52861	0.880387	4.77713	0.836312	6.2135	1.42592	5.07531	0.734655	4.84962	0.768539	149.944
	1000.8	25.0949	4.9859	4.4193	18.6601	3.46155	0.938889	5.33362	0.825347	5.8433	1.57966	5.51765	0.757204	5.0596	0.809782	161.916
	1498.62	23.6764	6.23956	4.54007	18.0878	3.85158	0.805758	5.17273	0.783567	5.88964	1.56452	4.72914	0.775992	4.93847	0.890424	142.469
	1790.31	46.8347	49.4166	10.3853	44.5899	9.83676	1.90704	10.6913	1.64727	9.71847	2.18876	7.16747	1.02686	6.44669	1.03087	192.516
	1790.31	46.7616	46.6467	10.3414	43.4008	8.97596	2.25071	9.78975	1.50251	9.85636	2.15418	7.32397	0.982756	6.42901	0.99124	185.91
Station O: 57.15 °N, 9.70 °W, 1953 m bottom depth
	4.896	21.5536	5.45853	3.62977	16.497	3.3422	0.842165	4.26076	0.779477	5.68165	1.42928	4.66494	0.658259	4.23316	0.648743	144.098	unfiltered
	5.174	21.496	5.37613	3.73354	16.1699	3.01417	0.834667	4.35664	0.770836	5.41326	1.39868	4.36354	0.663676	4.14492	0.623503	137.865	unfiltered
	149.499	21.0893	5.91699	3.85793	16.8216	3.37702	0.870711	4.49095	0.773764	5.53201	1.45073	4.72371	0.641781	4.08701	0.674462	136.621
	599.881	23.0007	7.79194	4.27506	17.7817	3.86238	0.844078	4.78	0.772589	6.10837	1.44761	4.75694	0.640378	4.59107	0.696091	147.906
	1061.7	24.3699	7.20219	4.65566	20.0713	3.9501	1.09328	4.5858	0.846759	5.91261	1.46894	5.09973	0.760811	4.84717	0.812518	149.033
	1062.23	26.1572	8.43048	4.60295	19.717	4.36417	0.984261	5.22583	0.887831	6.30396	1.49153	5.25994	0.759164	5.13832	0.774122	146.936
	1500.65	25.8376	6.45321	4.38587	18.6797	4.24558	0.925722	5.04046	0.80859	6.12973	1.57217	5.33505	0.677474	5.24866	0.851858	159.53
	1915.55	52.0071	60.3015	12.0019	51.3093	9.95526	2.32559	11.2239	1.76083	11.0287	2.45366	7.61495	1.14996	6.80495	1.15158	198.429
Station P: 57.10 °N, 9.42 °W, 1442 m bottom depth
	1314.45	27.678	12.2969	5.27732	21.7844	4.45767	1.12954	5.85044	0.880873	6.74661	1.58179	5.61035	0.746155	4.90464	0.775614	154.26
	1414.25	63.2175	78.7556	14.7672	59.6259	12.7457	2.75482	13.4542	2.06918	12.1083	2.62952	8.27529	1.19495	7.46046	1.20202	218.025
Station 9G: 56.73 °N, 7.33 °W, 166 m bottom depth
	5.128	19.1113	16.6051	4.03601	17.687	4.30614	0.894307	4.95376	0.865689	6.25897	1.51518	4.96138	0.672939	4.42146	0.719539	149.607	unfiltered
	5.128	18.0565	15.5493	3.66263	15.6765	3.52897	0.897122	5.18473	0.814799	5.82633	1.41277	4.95787	0.673691	4.46415	0.639873	141.961	unfiltered
	5.176	20.1233	18.8661	4.17772	18.0465	3.91428	0.953258	5.09167	0.885368	5.97238	1.53432	5.12625	0.705293	4.37025	0.719652	148.064	unfiltered
	5.176	18.4872	15.894	3.79148	16.8882	3.9626	1.01261	5.18935	0.828546	6.37037	1.51303	4.83606	0.724491	4.15652	0.637189	145.564	unfiltered
	25.189	18.2232	12.7835	3.68358	15.4547	4.09066	0.866031	4.95654	0.816343	5.38434	1.36638	4.68654	0.669319	3.96299	0.648766	138.364	unfiltered
	25.189	18.8822	13.1745	3.842	17.0684	4.15513	1.00927	4.6993	0.753512	5.92112	1.45523	4.93738	0.700837	4.16726	0.690411	144.449	unfiltered
	50.008	26.5522	25.2494	5.72837	24.9559	6.06753	1.30801	6.29915	0.996022	6.84561	1.59804	5.41156	0.726032	4.61428	0.760091	152.883	unfiltered
	50.008	24.0733	23.7122	5.34153	21.8732	4.96361	1.22166	6.06205	0.90929	6.5365	1.59405	5.0252	0.703797	4.27173	0.697457	148.406	unfiltered
	75.093	31.9738	40.2433	7.28032	31.508	6.88127	1.60138	7.63218	1.22696	7.98003	1.87558	5.71696	0.859044	5.19342	0.791987	158.931	unfiltered
	75.093	30.9794	40.4478	7.58488	30.8322	7.23323	1.58307	7.57831	1.21285	8.10138	1.829	5.91447	0.796812	5.23276	0.817638	155.678	unfiltered
	100.883	42.1344	63.509	10.8601	44.344	9.62488	2.29114	10.6295	1.67918	10.0101	2.19668	7.0725	0.980242	5.55193	0.855425	179.605	unfiltered
	100.883	43.6595	65.3618	10.7956	44.7892	10.2643	2.32168	11.663	1.63546	10.3174	2.20659	7.27306	0.985966	5.90013	0.925226	184.816	unfiltered
	154.543	53.545	90.6458	13.7823	57.9999	13.8177	2.8498	13.5871	2.10236	12.511	2.72271	7.95617	1.03986	6.70015	1.04719	205.964	unfiltered
	154.543	54.2411	88.6768	14.3064	57.9035	13.5764	2.91192	13.729	2.04684	12.3025	2.60317	7.66161	1.06537	6.45974	0.973762	201.824	unfiltered
	154.62	55.1701	95.3417	14.6656	59.905	12.5127	2.89759	13.5843	2.05752	12.4192	2.53034	7.41274	1.0162	6.14791	0.958038	198.449	unfiltered
	154.62	56.1978	92.1264	14.373	60.1552	13.0662	2.89297	14.1185	2.08237	12.3473	2.56947	7.88464	1.05974	6.78284	1.03034	206.608	unfiltered
PAAS values from Taylor and McLennan, 1985, as presented in Freslon et al., 2014 (μmol/kg):
		275.007	568.029	62.6652	235.022	36.9114	7.10695	29.5707	4.90796	28.8	6.00253	16.9797	2.42698	16.2955	2.51476	314.94

## Sheet: S2
Table S2: Temperature, salinity, oxygen, and nutrient variations with depth.
	Depth (m)	σθ	Temperature	Salinity	Oxygen	Silica	Phosphate	Total nitrogen	AOU
	(m)	(kg/m3)	(°C)	(psu)	(μmol/kg)	(μmol/kg)	(μmol/kg)	(μmol/kg)	(μmol/kg)			Phosphate	Silicate	Nitrate
											Analytical accuracy	0.995	0.998	0.995
Station IB 23: 63.62 °N, 20.21 °W, 132 m bottom depth											Analytical precision	>98%	>95%	>98%
	26.201	27.4594	7.676	35.171	310.338	1.45	0.42	7.58			Limit of detection	0.03uM	0.28uM	0.06uM
	50.996	27.4718	7.569	35.166	297.196	2.58	0.58	9.37
	76.58	27.4957	7.397	35.164	286.386	4.51	0.72	11.2
	101.928	27.5121	7.324	35.171	280.542	5.64	0.81	12.44
	120.861	27.5239	7.293	35.18	278.712	6.23	0.88	13.14
Station IB22: 63.22 °N, 20.07 °W, 679 m bottom depth
	6.582	27.4539	7.896	35.206	306.383	3.43		9.33
	25.978	27.4571	7.872	35.205	303.75	2.55	0.56	9.45
	51.548	27.4682	7.808	35.206	294.047	3.73	0.68	10.81
	76.863	27.4758	7.76	35.206	290.508	4.85	0.72	11.47
	101.412	27.4788	7.743	35.206	289.447	4.86	0.75	11.68
	151.569	27.5072	7.619	35.218	277.289	6.39	0.87	13.77
	252.594	27.5172	7.507	35.208	276.072	6.71	0.88	14.06
	353.136	27.5268	7.402	35.199	275.021	6.59	0.88	14.12
	453.014	27.5416	7.214	35.182	266.87	7.25	0.94	14.78
	551.312	27.5565	7.068	35.173	265.632	7.63	0.95	14.88
	602.146	27.5604	7.022	35.169	263.925	7.66	0.96	15.24
	661.391	27.6002	6.556	35.138	257.998	8.47	1	15.62
Station IB16: 61.75 °N, 20.00 °W, 1820 m bottom depth
	5.842	27.3848	8.259	35.188	294.715	3.16435	0.708896	10.6026	-8.8362
	5.9		8.288	35.189	294.813				-9.1239
	20.751	27.4362	7.905	35.185	291.44	3.47273	0.760303	11.3121	-3.236
	50.931	27.443	7.865	35.185	290.902	3.5344	0.760308	11.3943	-2.411
	76.342	27.4509	7.821	35.186	290.65	3.99678	0.791137	11.6821	-1.8538
	101.354	27.4595	7.766	35.186	287.474	4.68522	0.811693	12.3501	1.7004
	149.798	27.4712	7.719	35.191	287.42	5.62027	0.842526	12.9153	2.0886
	250.445	27.4966	7.616	35.202	281.127	6.5657	0.883647	13.9123	9.1126
	351.144	27.5028	7.557	35.197	279.362	6.76097	0.914478	14.385	11.3485
	451.598	27.5102	7.528	35.199	279.61	6.74047	0.914484	14.1488	11.3577
	600.822	27.5327	7.215	35.168	257.392	8.27164	1.02753	16.0295	35.8417
	750.582	27.6076	6.366	35.114	235.84	10.3891	1.1612	18.0242	63.4432
	1001.66	27.711	5.195	35.057	271.157	9.03358	1.02771	15.8781	36.8115
	1247.58	27.784	3.768	34.951	273.721	11.3878	1.12028	17.1537	45.4546
	1549.88	27.8455	3.534	34.996	279.09	10.0215	1.03812	15.7466	42.0407
	1685.63	27.8898	3.066	34.995	280.41	10.1658	1.02789	15.665	44.5499
	1784.91	27.8979	2.985	34.995	282.405	10.3304	1.01762	15.6138	43.28
Station IB9: 59.33 °N, 18.23 °W, 1878 m bottom depth
	10.746	27.3354	8.375	35.148	294.016	3.39021	0.636948	10.0679	-8.8053
	12.3		8.36	35.146	293.638				-8.3314
	21.34	27.3614	8.088	35.125	290.108	3.51358	0.688332	10.6537	-2.9882
	51.019	27.3953	7.826	35.117	285.559	4.02739	0.760272	11.589	3.3159
	75.716	27.4132	7.665	35.109	285.035	4.4487	0.801382	12.0618	4.9434
	101.343	27.4268	7.645	35.122	279.509	5.89743	0.821941	13.1716	10.5875
	150.668	27.4411	7.693	35.148	276.229	7.04825	0.86305	13.8807	13.5329
	250.822	27.4681	7.304	35.109	277.398	6.88404	0.873348	14.066	15.1081
	350.571	27.4865	6.964	35.07	279.937	7.57258	0.904188	14.6828	15.0171
	449.39	27.5132	7.038	35.115	275.542	7.98378	0.924762	15.2894	18.8882
	600.174	27.5446	6.745	35.101	257.66	9.06294	1.01727	16.3791	38.9088
	710.334	27.6054	6.171	35.08	227.034	11.5195	1.19202	18.6099	73.6563
	1003.18	27.7047	4.658	34.972	255.343	11.5206	1.14075	18.0157	56.7961
	1003.88	27.7039	4.658	34.971	255.034	11.5103	1.14075	17.9848	57.1056
	1250.85	27.7316	4.088	34.926	268.021	11.2639	1.09967	17.4714	48.7229
	1502.05	27.7552	3.84	34.921	269.253	12.0864	1.10998	17.5643	49.6057
	1641.92	27.7692	3.737	34.924	269.735	12.6621	1.10999	17.544	50.0232
	1742.47	27.7801	3.652	34.926	269.653	12.8061	1.14084	17.6778	50.8391
	1841.93	27.8012	3.493	34.932	269.991	13.865	1.11003	17.4726	51.8145
	1841.94		3.493	34.931	268.96				52.8497
Station IB4: 58.50 °N, 16.00 °W, 1209 m bottom depth
	10.342	27.2656	9.385	35.265	292.918	0.729359	0.431452	6.71832	-14.305
	10.37		9.384	35.265	293.481				-14.8635
	25.614	27.2925	9.21	35.262	291.368	0.791015	0.452009	6.88286	-11.6525
	49.945	27.32	9.089	35.271	285.489	0.883495	0.48284	7.36588	-5.0134
	75.246	27.3541	8.964	35.288	281.508	1.22255	0.554771	7.77707	-0.2645
	99.744	27.3566	8.947	35.287	280.544	1.4383	0.565046	7.98256	0.8252
	149.757	27.4012	8.732	35.299	272.194	3.76029	0.780825	11.7226	10.5475
	250.262	27.4231	8.584	35.295	268.58	5.85631	0.87331	13.1202	15.1811
	350.034	27.4314	8.507	35.288	269.095	6.34953	0.842494	13.1203	15.2413
	449.348	27.4373	8.425	35.277	269.995	6.64752	0.852773	13.2334	14.9578
	599.598	27.4575	8.083	35.233	260.627	7.50044	0.934986	14.5282	26.7233
	750.168	27.515	7.533	35.2	221.991	10.3882	1.14054	17.663	69.1533
	800.872	27.5574	7.179	35.189	219.481	10.8305	1.16114	18.0234	74.0987
	984.727		5.767	35.095	231.724				72.0043
	985.446	27.6709	5.783	35.096	231.726	13.3803	1.20237	18.4878	71.8861
	1083.65	27.7057	5.119	35.038	238.583	15.1587	1.21269	18.807	70.0429
	1183.49	27.7238	4.689	34.998	247.382	17.646	1.22299	18.3346	64.5961
	1184.04		4.689	34.998	245.518				66.4605
Station F: 57.51 °N, 12.25 °W, 1825 m bottom depth
	4.508	27.1608	10.482	35.371	285.868	0.359506	0.410864	6.25541	-14.0847
	4.875		10.478	35.37
	5.073		10.48	35.371
	5.244		10.481	35.371	287.015				-15.2235
	5.574		10.478	35.37
	24.824	27.1623	10.468	35.369	284.92	0.328692	0.421137	6.38895	-13.0343
	49.645	27.2204	10.1	35.36	275.664	0.924498	0.523882	7.62198	-1.5458
	75.133	27.2541	9.967	35.373	270.994	1.54088	0.56499	8.25912	3.9153
	100.159	27.2753	9.892	35.383	271.144	1.7361	0.59582	8.6702	4.2172
	149.047	27.3061	9.609	35.36	262.845	3.73939	0.719114	11.4956	14.3181
	249.288	27.3378	9.628	35.402	263.096	4.30455	0.76023	11.6192	13.9464
	349.708	27.3516	9.482	35.386	262.1	4.76691	0.791061	12.1741	15.9384
	449.203	27.3649	9.48	35.4	263.107	4.46904	0.76025	11.9585	14.9912
	599.167	27.3924	9.124	35.357	255.253	5.57874	0.832188	13.0171	25.235
	749.261	27.437	8.624	35.309	256.768	6.23654	0.883596	13.7266	27.0703
	900.822	27.5204	7.843	35.261	209.392	9.77172	1.17137	18.1563	79.6974
	1000.06	27.6152	6.845	35.2	221.236	10.6461	1.18176	18.0963	74.741
	1000.8	27.6148	6.848	35.2	220.46				75.497
	1248.81	27.716	5.108	35.047	248.507	10.8321	1.16132	17.3787	60.2978
	1498.62	27.7605	4.218	34.976	261.014	11.5109	1.16137	17.3383	54.8041
	1589.63	27.7717	3.995	34.96	262.268	12.7546	1.17166	17.4207	55.3702
	1689.05	27.795	3.709	34.952	262.065	14.9236	1.19224	17.6164	57.8857
	1790.31		3.183	34.931	261.801				62.434
	1790.47	27.8289	3.188	34.931	259.987	21.3686	1.27451	18.2851	64.2038
Station O: 57.15 °N, 9.70 °W, 1953 m bottom depth
	5.174	27.1452	10.671	35.394	292.252	1.11959	0.328686	5.6493	-21.6196
	19.967	27.1999	10.324	35.385	292.649	1.12992	0.441696	6.98496	-19.9379
	49.724	27.2327	10.146	35.386	284.874	1.12996	0.626612	7.67343	-11.0804
	75.178	27.2384	10.117	35.386	276.223	1.30459	0.534164	7.64265	-2.2391
	100.066	27.2445	10.09	35.387	275.126				-0.9641
	149.499	27.3062	9.785	35.398	270.689	1.93134	0.616384	10.7045	5.3336
	249.811	27.3443	9.641	35.413	265.104	4.0991	0.719141	12.698	11.8434
	350.093	27.3516	9.605	35.412	263.395	4.18132	0.719146	12.9241	13.8449
	449.893	27.3602	9.537	35.406	264.541	4.90051	0.739699	12.9756	13.2005
	599.881	27.3683	9.493	35.403	264.667	5.00328	0.749979	13.1298	13.4606
	750.958	27.385	9.315	35.383	257.114	5.55815	0.811634	13.767	22.2577
	1061.7	27.5617	7.43	35.234	224.984				67.0155
	1062.23	27.5558	7.477	35.235	225.216	9.43296	1.09948	18.198	66.4625
	1250.6	27.7133	5.165	35.052	248.72	10.8732	1.16132	18.5708	59.6623
	1500.65	27.7538	4.274	34.975	262.583	11.3567	1.16136	18.7565	52.8144
	1715.17	27.7817	3.766	34.942	266.075	13.2173	1.18195	18.8701	53.475
	1815.21	27.795	3.584	34.935	266.083	14.6358	1.19224	18.7059	54.9828
	1915.55		3.311	34.93	264.553				58.7568
	1916.21	27.8181	3.31	34.93	264.319	17.9765	1.23338	19.2202	58.9972
Station P: 57.10 °N, 9.42 °W, 1442 m bottom depth
	1314.45	27.7269	4.845	35.022	252.071	12.18	1.15	18.07
	1414.14	27.7561	4.19	34.968	260.236	12.29	1.14	18.06
Station 9G: 56.73 °N, 7.33 °W, 166 m bottom depth
	5.172	26.9027	10.764	35.104	312.395	0.82	0.01	0
	20.048	26.9756	10.689	35.18	303.456	1.01	0.06	0.61
	25.189	27.0452	10.544	35.236	286.815	1.2	0.16	1.77
	50.008	27.2371	10.107	35.383	262.023	2.27	0.46	4.97
	75.093	27.2518	9.948	35.366	260.5	2.55	0.49	4.8
	100.883	27.2733	9.858	35.373	258.607	3.04	0.53	4.92
	150.855	27.3029	9.582	35.35	255.854	3.22	0.55	4.74
	154.62	27.3031	9.586	35.351	256.182	3.63	0.55	4.69

## Sheet: S3
Table S3: Sources of REE in the marine environment
		La	Ce	Pr	Nd	Sm	Eu	Gd	Tb	Dy	Ho	Er	Tm	Yb	Lu
BATS seawater (van de Flierdt et al., 2012)
		Concentration (ng/g)
	BATS 2000 m	3.279	0.717	0.568	2.499	0.519	0.138	0.761	0.125	0.943	0.251	0.843	0.126	0.824	0.141
	BATS 15 m	2.048	1.684	0.439	2.037	0.482	0.135	0.76	0.126	0.959	0.245	0.803	0.118	0.719	0.117
Porewaters (Abbott et al., 2015)
	Core:	Concentration (pmol/l)
	HH200	183.701	469.595	57.3491	225.349	52.5576	11.8522	48.6838	6.645	33.7352	6.09711	17.4244	2.28987	13.2077	2.06686	top 11.1 cm
	HH500	228.197	497.533	74.0607	270.749	66.1782	15.5328	62.4561	8.19574	45.7929	8.41072	22.3175	3.16318	17.1419	2.89374	top 7.4 cm
	HH1200	322.89	741.654	85.8627	349.04	68.3477	17.0719	71.8962	9.76674	51.3135	10.341	29.1226	4.41076	26.5308	4.15698	top 11.1 cm
	HH3000	504.735	997.591	122.77	490.17	101.754	25.2184	112.63	15.4664	86.5244	17.6822	50.8327	7.52927	48.4086	7.73634	top 11.1 cm
Biogenic carbonate (Sholkovitz and Shen, 1995)
		Concentration (ng/g)
	Bermuda corals	2.44751	4.75273	0.729899	3.58009	1.14905	0.210926	1.63697	0.264559	1.52717	0.390201	1.31198	0.181556	1.19476	0.176716
Sedimentary organic matter (Freslon et al., 2014)
	H2O2 (%)	Concentration (ng/g)
	0.5	8021.74	23576.1	2902.17	11347.8	2565.22	576.087	2195.65	336.957	1869.57	347.826	913.043	122.008	771.739	108.696
	1	10402.1	30536.1	3752.58	14742.3	3288.66	721.649	2773.2	422.68	2268.04	412.371	1092.78	143.332	886.598	123.711
	2.5	6081.97	17688.5	2204.92	8729.51	1967.21	434.426	1622.95	245.902	1311.48	245.902	631.148	83.6933	524.59	73.7705
	5	11244.9	32561.2	4081.63	16173.5	3622.45	795.918	2928.57	459.184	2387.76	459.184	1183.67	155.911	969.388	132.653
	10	9398.44	26820.3	3375	13375	2984.38	664.062	2476.56	382.812	1984.38	382.812	984.375	130.12	812.5	109.375
	15	11278.8	31663.5	4000	15884.6	3490.38	778.846	2961.54	451.923	2403.85	451.923	1163.46	153.182	951.923	134.615
	20	11627.5	32656.9	4137.25	16372.5	3617.65	803.922	3058.82	460.784	2509.8	460.784	1215.69	159.734	990.196	137.255
Labile Fe phases (Bayon et al., 2004; Du et al., 2016; Gtujahr et al., 2007)
		Concentration (μg/g)
	Foram coatings	4.35864	2.60711	4.16195	4.69027	6.03604	7.22222	7.76344	7.11538	7.31838	7.77778	7.35915	7.19512	6.70213	6.88636	Bayon et al., 2004
	3 hr leach	0.0141646	0.0122046	0.0159455	0.0194773	0.0300659	0.0454027	0.0381344	0.0333296	0.0338223	0.0298025	0.0281957	0.0251422	0.0225752	0.025324	Du et al., 2016
	all HH4 leachates	0.0794474	0.0972219	0.106808	0.107919	0.15013	0.165535	0.169677	0.149715	0.135209	0.117396	0.0980829	0.097019	0.0864854	0.0775253	Gutjahr et al., 2007
Icelandic ash (Tepe and Bau, 2014)
	Eyjafjallajokull ash (2010)
		Concentration (μg/g)
	Jokulsa I Solheima ash I	40.91	92.86	11.81	48.58	11.44	3.27	11.06	1.8	10.41	2.01	5.62	0.73	4.78	0.68
	Jokulsa I Solheima ash II	32.53	75.23	9.72	40.98	9.95	2.96	9.81	1.46	8.49	1.56	4.19	0.53	3.28	0.45
	Jokulsa I Solheima ash III	29.58	70.26	9	37.88	9.41	2.87	9.32	1.4	8.32	1.55	4.23	0.54	3.44	0.49
	Markarfljot ash	44.08	99.71	12.74	52.65	12.4	3.66	12.11	1.91	11.33	2.15	6.01	0.79	5.13	0.74
